# Supplementary material for: Representation of Patients With Chronic Kidney Disease in Clinical Trials of Cardiovascular Disease Medications: A Systematic Review
Source: PubMed Central journal article supplement (PMC10921252; doi:10.1001/jamanetworkopen.2024.0427), 2024-03-07
Supplement: jamanetwopen-e240427-s003.pdf [file jamanetwopen-e240427-s003.pdf]

## Data Sharing Statement

Colombijn. Representation of Patients With Chronic Kidney Disease in Clinical Trials of Cardiovascular Disease Medications. *JAMA Netw Open*. Published March 07, 2024. doi:10.1001/jamanetworkopen.2024.0427

### Data

**Data available:** Yes

**Data types:** Data (not involving human participants)

**How to access data:** All data in this review are based on publicly available articles. Dataset and syntax are available upon request

**When available:** With publication

### Supporting Documents

**Document types:** Statistical/analytic code

**How to access documents:** All data in this review are based on publicly available articles. Dataset and syntax are available upon request

**When available:** With publication

### Additional Information

**Who can access the data:** All data in this review are based on publicly available articles. Dataset and syntax are available upon request

**Types of analyses:** All data in this review are based on publicly available articles. Dataset and syntax are available upon request

**Mechanisms of data availability:** All data in this review are based on publicly available articles. Dataset and syntax are available upon request
